# Supplementary material for: Synthesis, characterization, in-vitro antimicrobial properties, molecular docking and DFT studies of 3-{(E)-[(4,6-dimethylpyrimidin-2-yl)imino]methyl} naphthalen-2-ol and Heteroleptic Mn(II), Co(II), Ni(II) and Zn(II) complexes
Source: publisher site journal article supplement (doi:10.1515/chem-2018-0020), 2018-01-01
Supplement: Supplementary file 1 [file chem-2018-0020_sm.pdf]

## Supplementary Information

## Open Access

# Supplement: Synthesis, characterization, *in-vitro* antimicrobial properties, molecular docking and DFT studies of 3-{(E)-[(4,6-dimethylpyrimidin-2-yl)imino]methyl}naphthalen-2-ol and Heteroleptic Mn(II), Co(II), Ni(II) and Zn(II) complexes

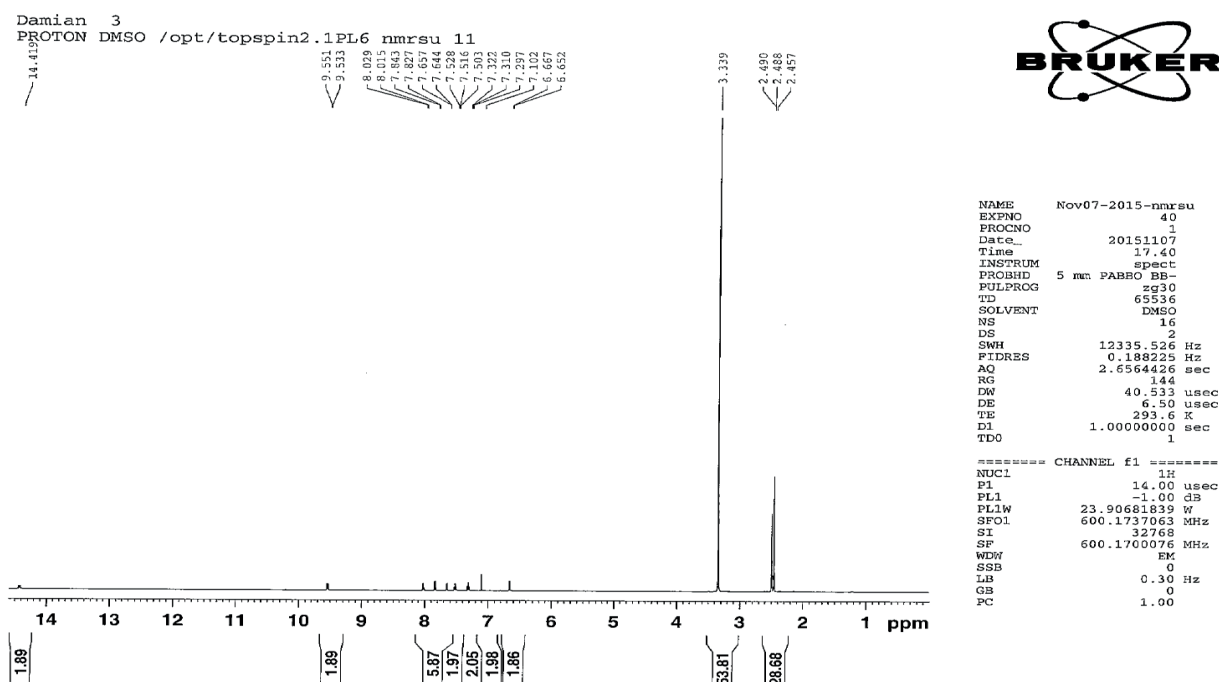

Damian 3  
C13CPD\_amv DMSO /opt/topspin2.1PL6 nmrsu 11

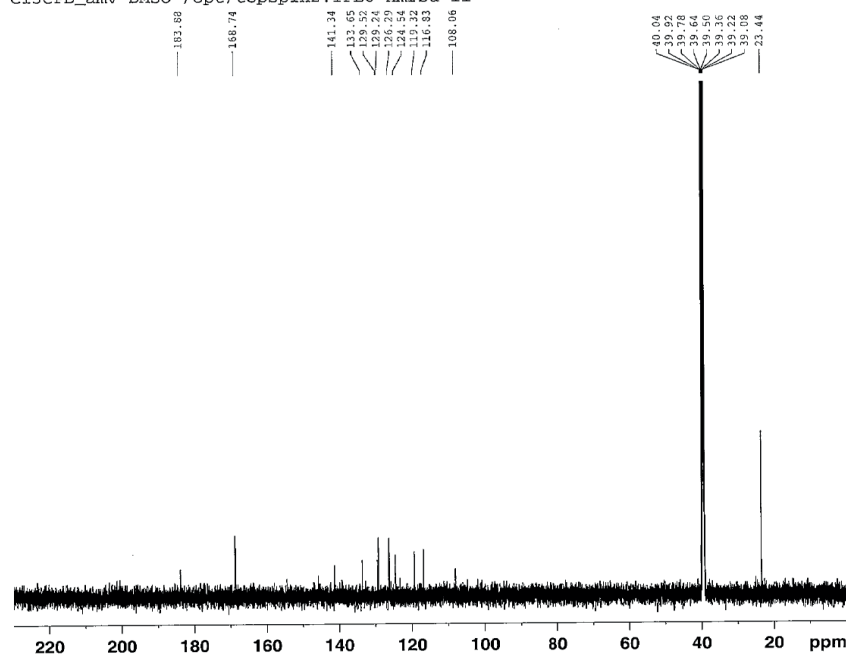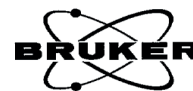

```

NAME      Nov07-2015-nmrsu
EXPNO     41
PROCNO    1
Date_     20151107
Time      17.54
INSTRUM   spect
PROBHD    5 mm PABBO BB-
PULPROG   zgpg30
TD         65536
SOLVENT   DMSO
NS         256
DS         4
SWH        36057.691 Hz
FIDRES     0.550197 Hz
AQ         0.9088159 sec
RG         2050
DW         13.867 usec
DE         6.50 usec
TE         294.5 K
D1         2.0000000 sec
D11        0.0300000 sec
TD0        1

===== CHANNEL f1 =====
NUC1       13C
P1         10.00 usec
PL1        -1.00 dB
PL1W       48.09095001 W
SFO1       150.9300706 MHz

===== CHANNEL f2 =====
CPDPRG2    waltz16
NUC2       1H
PCPD2      95.00 usec
PL2        -1.00 dB
PL12       16.08 dB
PL13       19.00 dB
PL2W       23.80681839 W
PL12W      0.46829745 W
PL13W      0.23906820 W
SFO2       600.1724007 MHz
SI         32768
SF         150.9129354 MHz
WDW        EM
SSB        0
LB         1.00 Hz
GB         0
PC         1.40

```

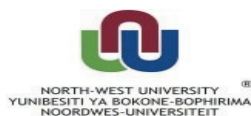

## Mass Spectrum SmartFormula Report

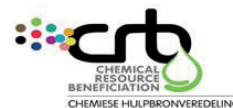

### Analysis Info

Analysis Name D:\Data\06112015\LADMS000003.d  
Method tune\_low20102015.m  
Sample Name HL3  
Comment

Acquisition Date 11/6/2015 10:32:21 AM  
Laboratory Laboratory for Analytical Services  
Operator JHL Jordaan  
Instrument / Ser# micrOTOF-Q II 10390

### Acquisition Parameter

|             |            |                       |           |                  |           |
|-------------|------------|-----------------------|-----------|------------------|-----------|
| Source Type | APCI       | Ion Polarity          | Positive  | Set Nebulizer    | 1.6 Bar   |
| Focus       | Not active | Set Capillary         | 4500 V    | Set Dry Heater   | 200 °C    |
| Scan Begin  | 50 m/z     | Set End Plate Offset  | -500 V    | Set Dry Gas      | 8.0 l/min |
| Scan End    | 1500 m/z   | Set Collision Cell RF | 100.0 Vpp | Set Divert Valve | Waste     |

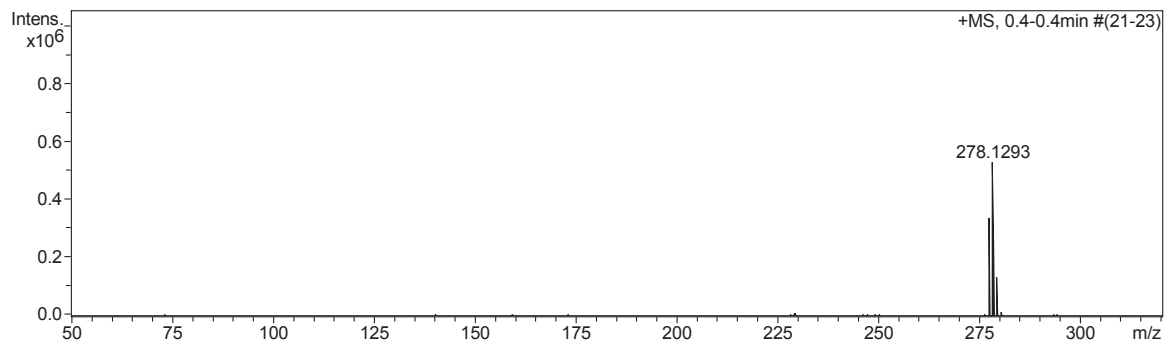

| Meas. m/z | # | Formula         | Score  | m/z      | err [mDa] | err [ppm] | mSigma | rdb  | N-Rule | e <sup>-</sup> Conf |
|-----------|---|-----------------|--------|----------|-----------|-----------|--------|------|--------|---------------------|
| 278.1293  | 1 | C 17 H 16 N 3 O | 100.00 | 278.1288 | -0.5      | -1.9      | 31.7   | 11.5 | ok     | even                |
